# Supplementary material for: Reducing Door to- Balloon- Time for Acute ST Elevation Myocardial Infarction In Primary Percutaneous Intervention: Transformation using Robust Performance Improvement
Source: PubMed Central journal article supplement — BMJ Qual Improv Rep. 2015 Jun 8;4(1):u207849.w3309. doi: 10.1136/bmjquality.u207849.w3309 (PMC4645801; doi:10.1136/bmjquality.u207849.w3309), 2015-06-08
Supplement: bmjqir-4-u207849-w3309-s1.pdf [file bmjqir-4-u207849-w3309-s1.pdf]

**PERCENT OF PATIENTS WITH PRIMARY PCI DONE WITHIN 90 MINUTES  
(JUNE - NOVEMBER 2011)**

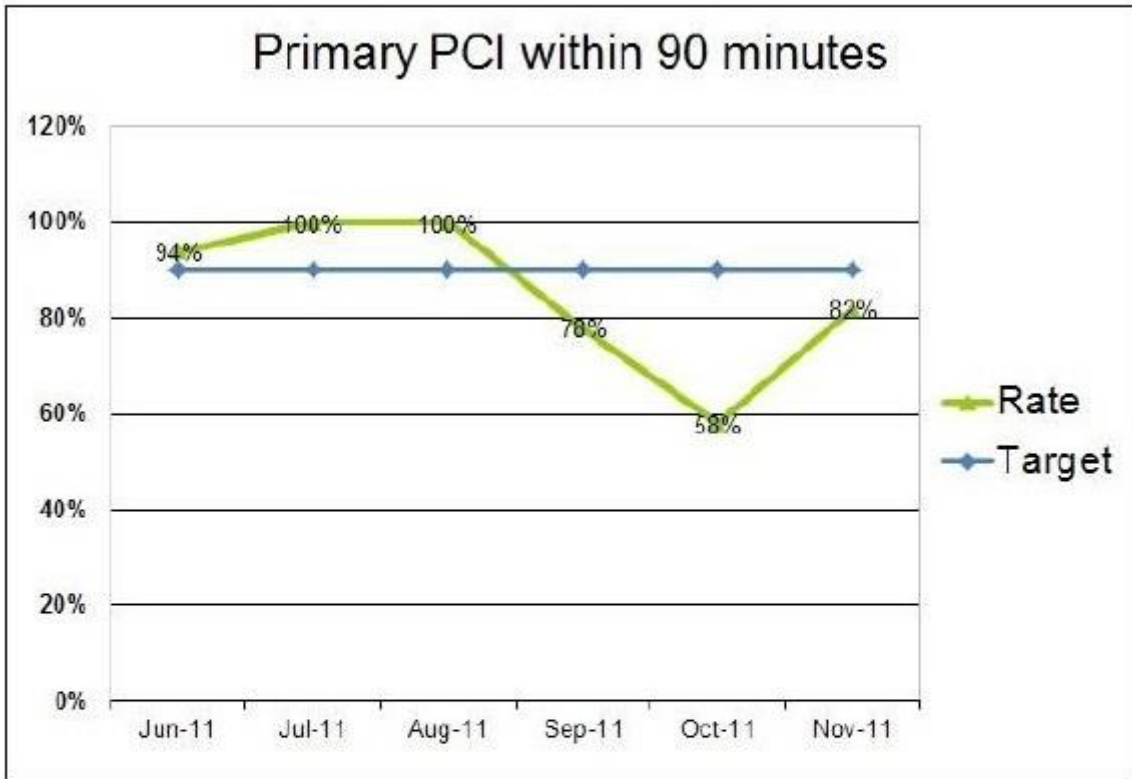

**AVERAGE TIMES FOR PATIENTS NOT MEETING THE 90-MINUTE TARGET**

| <b>DOOR-TO-BALLOON PHASE</b>             | <b>AVERAGE MEASURED TIME (minutes)</b> | <b>RECOMMENDED TIME (minutes)</b> |
|------------------------------------------|----------------------------------------|-----------------------------------|
| Door to ECG                              | 24                                     | <10                               |
| ECG to STEMI Confirmation / Activation   | 31                                     | 10                                |
| STEMI Confirmation to CathLab Activation | 25                                     | 15                                |
| CathLab Activation to Device Deployment  | 82                                     | 50-60                             |
