# Supplementary material for: Reducing Door to- Balloon- Time for Acute ST Elevation Myocardial Infarction In Primary Percutaneous Intervention: Transformation using Robust Performance Improvement
Source: PubMed Central journal article supplement — BMJ Qual Improv Rep. 2015 Jun 8;4(1):u207849.w3309. doi: 10.1136/bmjquality.u207849.w3309 (PMC4645801; doi:10.1136/bmjquality.u207849.w3309), 2015-06-08

**INITIAL PROCESS**

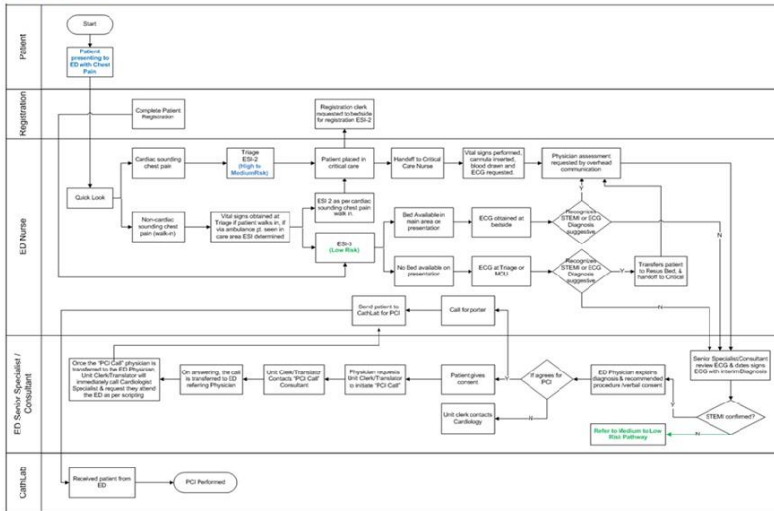

**IMPROVED PROCESS**

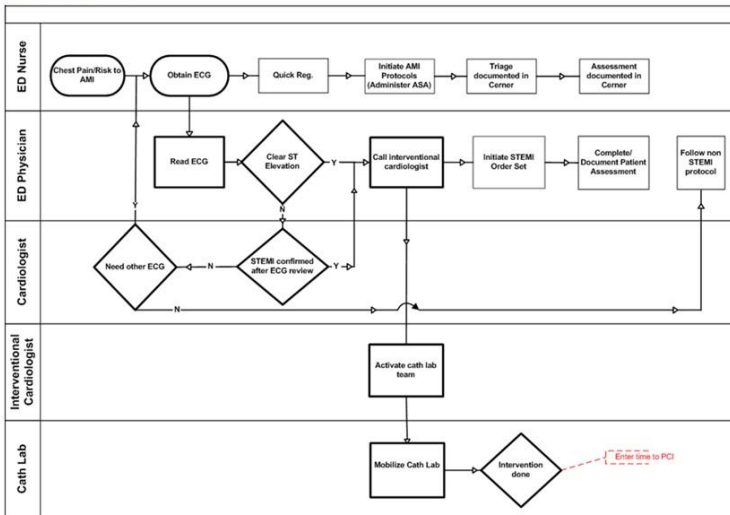

**PRIMARY PCI TIMES (BEFORE AND AFTER THE PROJECT)**

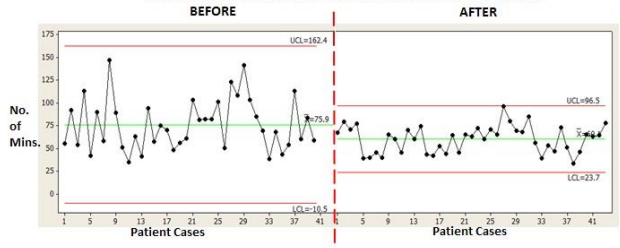

**PERCENT OF PATIENTS WITH PRIMARY PCI DONE WITHIN 90 MINUTES BEFORE THE PROJECT (SEP - DEC 2011) & AFTER THE PROJECT (JAN - AUG 2012)**

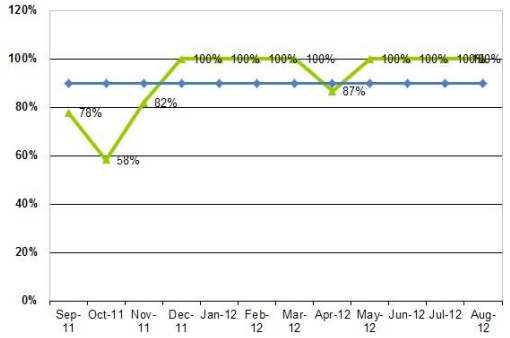

Supplement: bmjqir-4-u207849-w3309-s2.pdf [file bmjqir-4-u207849-w3309-s2.pdf]
